# Supplementary material
Source: HighWire-hosted journal article supplement (https://genome.cshlp.org/content/suppl/2002/07/08/12.7.1019)
Supplement: Halfon_SuppTable2.pdf [file Halfon_SuppTable2.pdf]

Supplemental Table 2. Values used in calculation of Fisher's exact test  $P$  value ( $P=0.0001$ ). A list of genes with annotated expression patterns and the subset of genes annotated as being expressed in the mesoderm was obtained from Flybase (19) and used to perform a Fisher's exact test as shown. The Flybase annotations do not discriminate between expression in different parts/at different times in the mesoderm. There are a total of 1577 genes which are present in annotations for both genome location and expression.

|                     | Mesodermal expression | Non-mesodermal expression |
|---------------------|-----------------------|---------------------------|
| Near an element     | 54                    | 88                        |
| Not near an element | 331                   | 1104                      |
